# Supplementary material for: Functional Recovery and Serum Angiogenin Changes According to Intensity of Rehabilitation Therapy After Stroke
Source: PubMed Central journal article supplement (PMC8655101; doi:10.3389/fneur.2021.767484), 2021-11-25

## SUPPLEMENTARY FIGURES

### **Functional recovery and serum angiogenin changes according to intensity of rehabilitation therapy after stroke.**

Nicolás Garcia-Rodriguez, MD<sup>1,2</sup>, Susana Rodriguez, MD<sup>2</sup>, Pedro Ignacio Tejada, MD<sup>3</sup>, Zuberoa Maite Miranda-Artieda, MD<sup>3</sup>, Natalia Ridaó, MD<sup>4</sup>, Xavi Buxó, MD<sup>2</sup>, María Engracia Pérez-Mesquida, MD<sup>2</sup>, Maria Rosario Beseler, MD<sup>5</sup>, Juan B. Salom, MD<sup>6,7</sup>, Laura M. Pérez, MD<sup>8,9</sup>, Marco Inzitari, MD<sup>8,10</sup>, Sergio Otero-Villaverde, MD<sup>11</sup>, Rosa Martin-Mourelle, MD<sup>11</sup>, Mercedes Molleda, MD<sup>12</sup>, Manuel Quintana, MSc<sup>13</sup>, Marta Olivé-Gadea, MD<sup>14</sup>, Anna Penalba<sup>1</sup>, Anna Rosell, PhD<sup>1</sup>

<sup>1</sup>Neurovascular Research laboratory, Vall d'Hebron Research Institute, Universitat Autònoma de Barcelona. Spain.

<sup>2</sup>Unidad de Rehabilitación Neurológica y Daño Cerebral, Hospital Vall d'Hebron, Barcelona, Spain.

<sup>3</sup>Unidad de Daño Cerebral del Hospital de Górliz. Osakidetza. Spain.

<sup>4</sup>Servei de Medicina Física i Rehabilitació. Parc Taulí Hospital Universitari. Institut d'Investigació i Innovació Parc Taulí I3PT. Sabadell. Spain.

<sup>5</sup> Servicio de Medicina Física y Rehabilitación, Hospital Universitario y Politécnico La Fe, Valencia, Spain.

<sup>6</sup>Unidad Mixta de Investigación Cerebrovascular, Instituto de Investigación Sanitaria La Fe–UV, Valencia, Spain.

<sup>7</sup>Departamento de Fisiología, Universidad de Valencia, Valencia, Spain.

<sup>8</sup> RE-FiT Barcelona Research Group, Vall d'Hebron Institute of Research and Parc Sanitari Pere Virgili, Barcelona, Spain.

<sup>9</sup>Parc Sanitari Pere Virgili, Area of Intermediate Care, Barcelona, Spain.

<sup>10</sup>Universitat Oberta de Catalunya.

<sup>11</sup>Hospital Marítimo de Oza, A Coruña, Spain.

<sup>12</sup>Hospital Universitari Germans Trias i Pujol, Badalona, Spain.

<sup>13</sup>Epilepsy Unit and Research Laboratory Hospital Vall d'Hebron, Barcelona, Spain.

<sup>14</sup>Stroke Group. Vall d'Hebron Research Institute, Barcelona, Spain.

**Corresponding author:** Anna Rosell, PhD. Neurovascular Research Laboratory, Institut de Recerca Hospital Vall d'Hebron. Passeig Vall d'Hebron 119-129, Barcelona, Spain. +34 93489409; [anna.rosell@vhir.org](mailto:anna.rosell@vhir.org)

**Figure S1. Functional outcome.** Box-plots representing the median and IQR temporal profile of the tested scales during follow-up in IRT and NO-IRT cohorts. Differences were assessed with the Wilcoxon test, \* $p < 0.05$ ; \*\* $p < 0.01$ , and \*\*\* $p < 0.001$ .

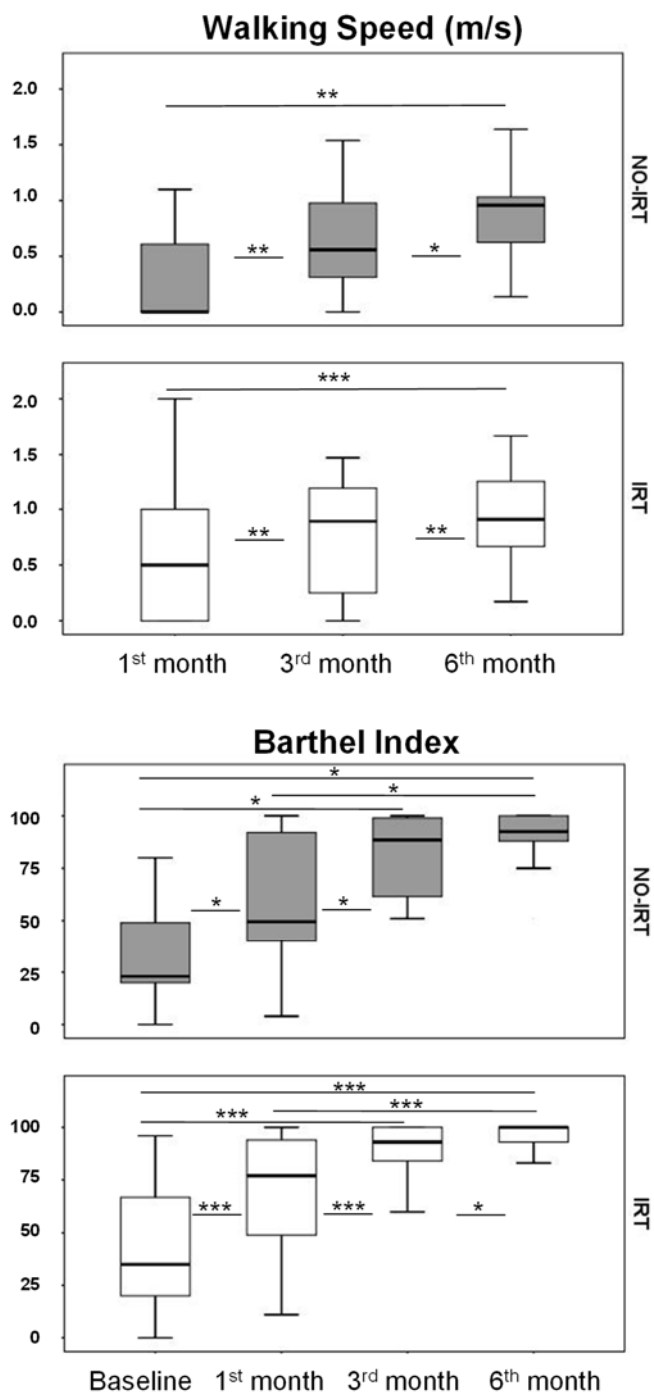

**Figure S2. Serum Angiogenin.** Jitter plots showing the temporal profile of serum angiogenin levels in all strokes regardless the type of rehabilitation therapy. Bars represent mean and 95%CI, and the dashed line shows mean Control levels. Differences were assessed with the Wilcoxon test, \*p<0.05.

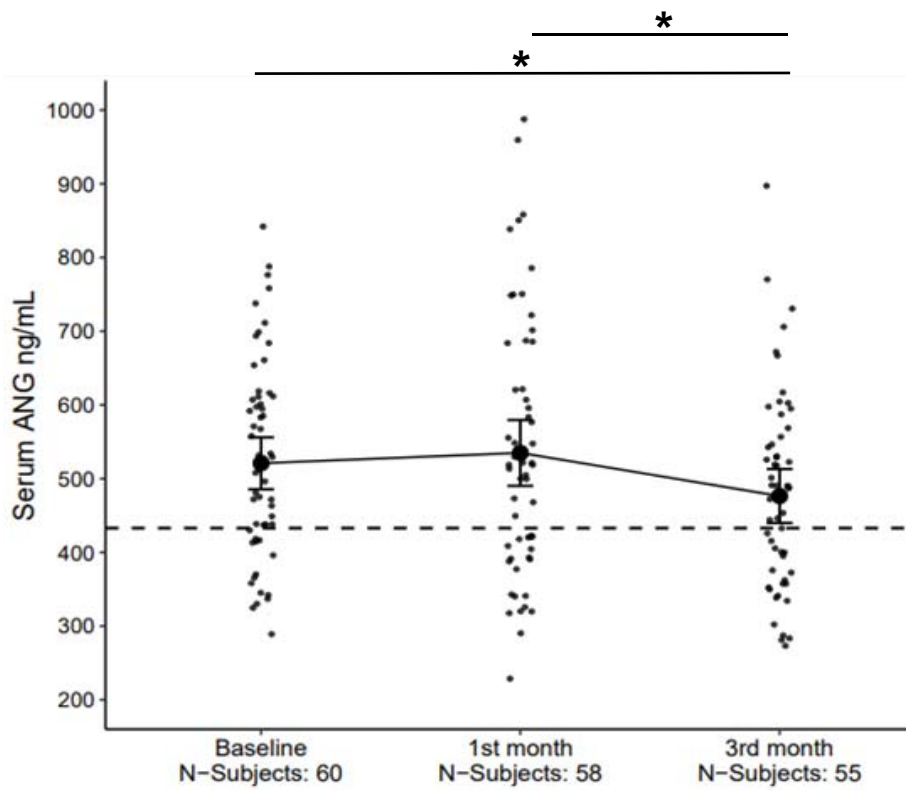

Supplement: Data_Sheet_1.pdf [file Data_Sheet_1.pdf]
